# Supplementary material for: The stray light induced redshift of absorption peaks of inorganic anions in the far ultraviolet region—an “artifact”
Source: Royal Society of Chemistry journal article supplement (doi:10.1039/d4an00400k), 2024-01-01
Supplement: d4an00400k1.pdf [file d4an00400k1.pdf]

## Appendix A. Supplementary data

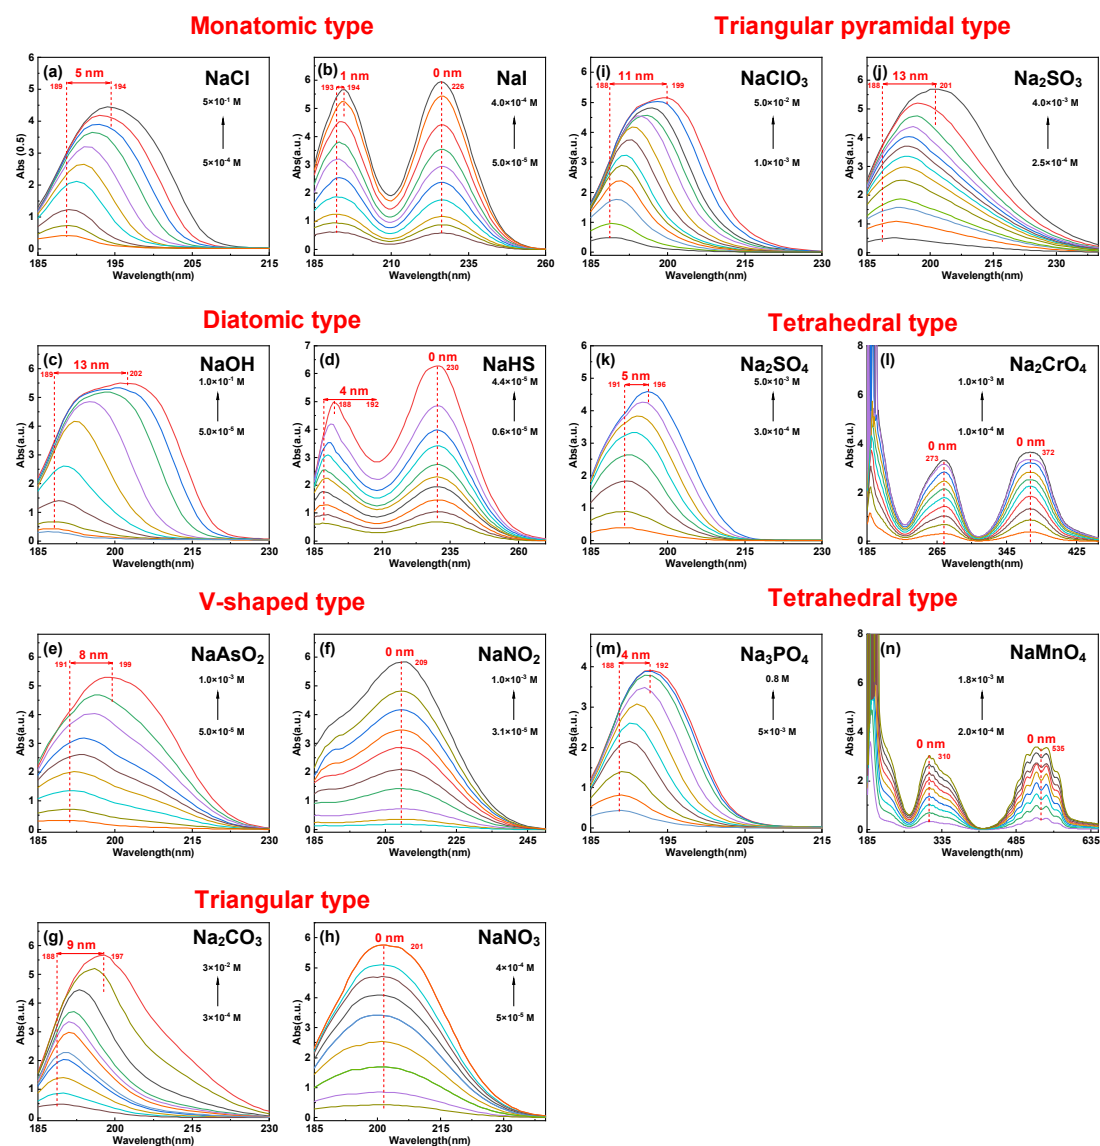

Fig. A.1. The absorption spectra of various anions with concentrations increase.

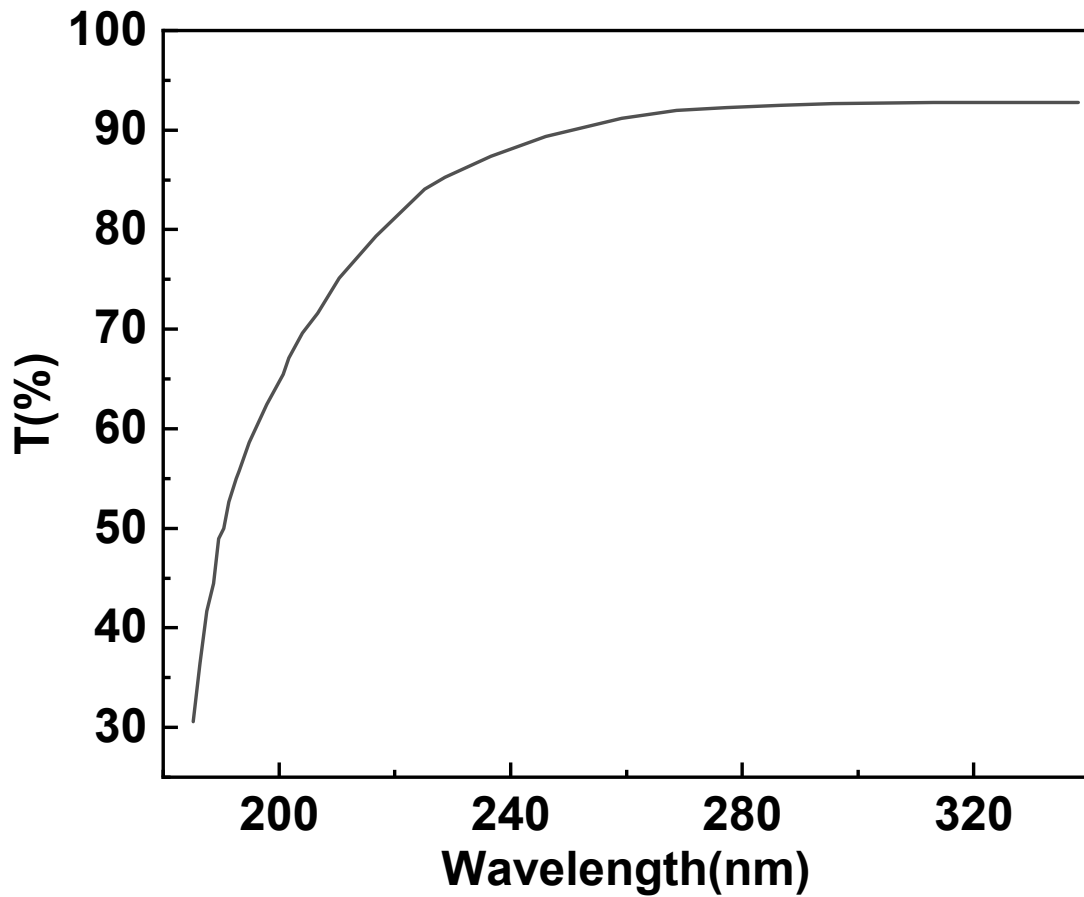

Fig. A.2. Transmittance of UV glass to different wavelengths of light.

The data are from the technical specifications for deuterium lamps.

([https://www.hamamatsu.com.cn/content/dam/hamamatsu-photonics/sites/documents/99\\_SALES\\_LIBRARY/etd/D2lamps\\_TLS1017E.pdf](https://www.hamamatsu.com.cn/content/dam/hamamatsu-photonics/sites/documents/99_SALES_LIBRARY/etd/D2lamps_TLS1017E.pdf))
